# Supplementary material for: Many small climate change impacts presage rapid population extinction in a common iconic bird
Source: Research Square preprint supplement (doi:10.21203/rs.3.rs-6488920/v1), 2025-06-09
Supplement: Supplementary file 1 [file ef7d2b48532bd7b458295f8e.pdf]

# Supplementary Information

## Contents

|                                       |               |
|---------------------------------------|---------------|
| <b>Extended Data Figures .....</b>    | <b>1</b>      |
| Fig. 1.....                           | 1             |
| Fig. 2.....                           | 3             |
| Fig. 3.....                           | 5             |
| Fig. 4.....                           | 6             |
| Fig. 5.....                           | 8             |
| Fig. 6.....                           | 9             |
| Fig. 7.....                           | 13            |
| <br><b>Supplementary Tables .....</b> | <br><b>15</b> |
| Table S1.....                         | 15            |
| Table S2.....                         | 16            |
| Table S3.....                         | 18            |
| Table S4.....                         | 19            |

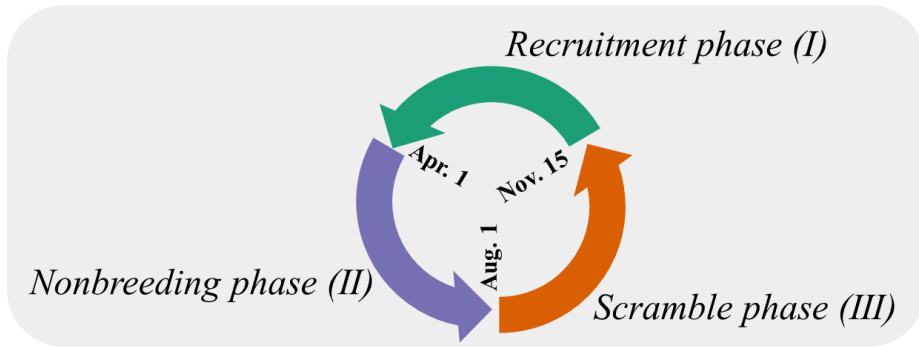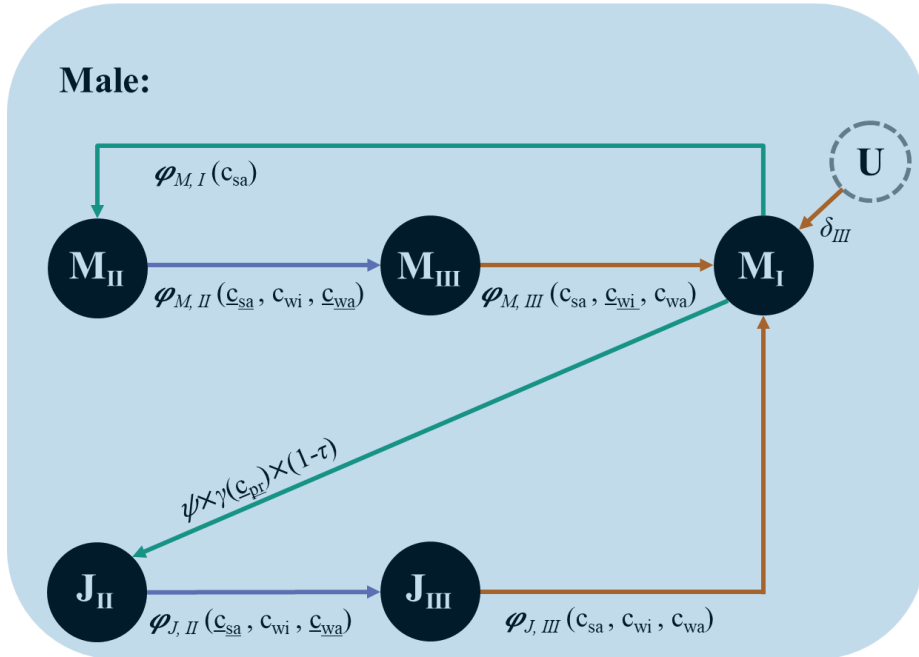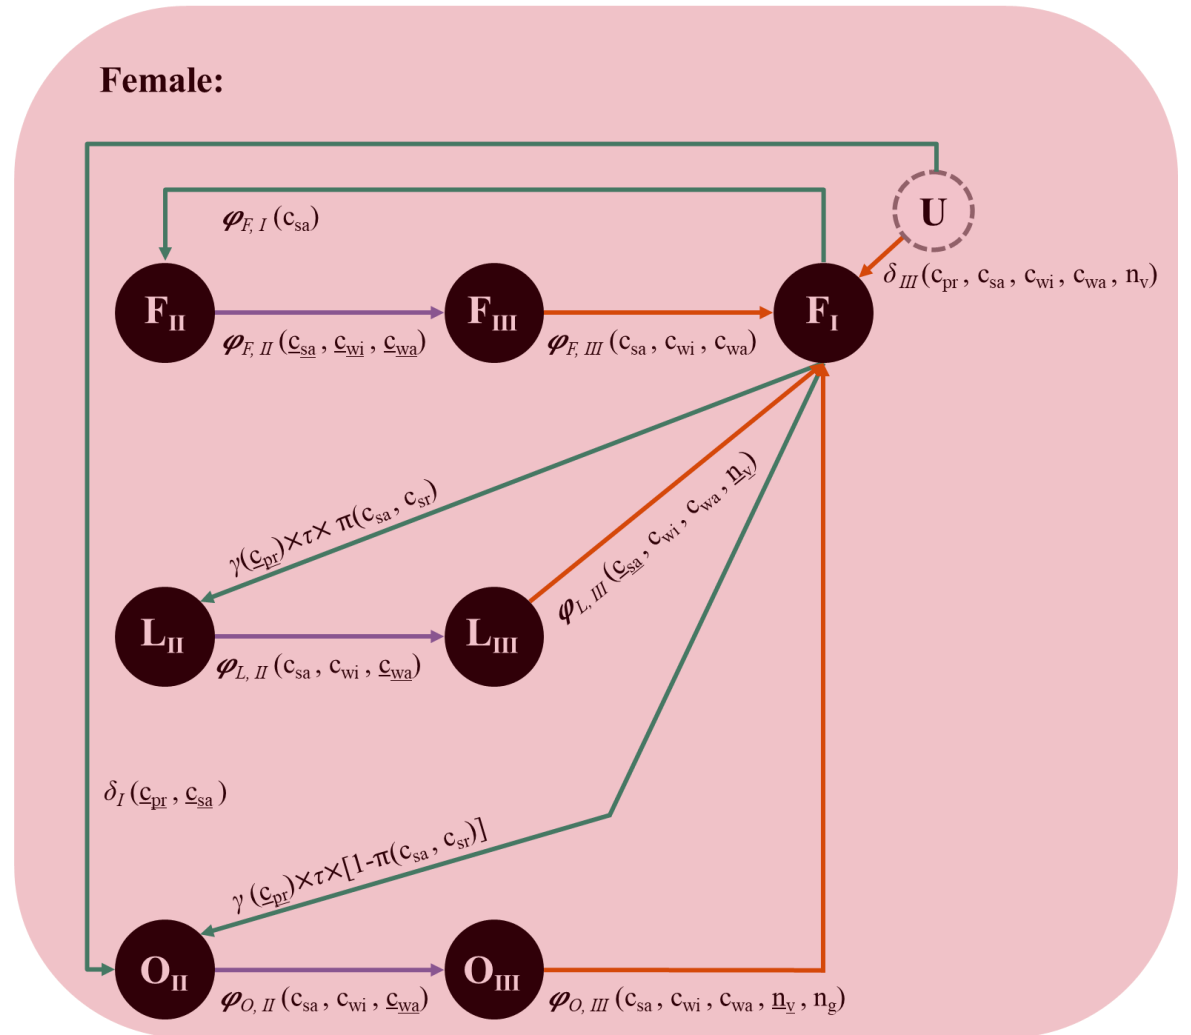

- 1 **Extended Data Fig. 1 | Detailed life-cycle diagram of superb fairy-wrens with climate/density variables.** The top panel shows three phases
- 2 throughout the annual cycle with three dates to distinguish five stage classes of individuals in the population: F: adult females; L: natal juvenile

3 females; O: non-natal juvenile females; M: adult males; J: juvenile males (which are virtually all natal). ‘U’ denotes unobservable individuals  
4 outside of the study area which are the source of immigrants. Arrows indicated the transition probabilities among state classes (i.e., vital rates; see  
5 details in the main text). Letters in parentheses indicate each variable that may influence a given vital rate. Climate variables: ‘ $c_{pr}$ ’: spring rainfall;  
6 ‘ $c_{sa}$ ’: summer maximum temperature; ‘ $c_{sr}$ ’: summer rainfall; ‘ $c_{wi}$ ’: winter minimum temperature; ‘ $c_{wa}$ ’: winter maximum temperature. Density  
7 variables: ‘ $n_v$ ’: the breeding vacancy availability index (see materials and methods); ‘ $n_g$ ’: male group size, calculated as average number of males  
8 per female on 1 August. Climate/density variables which were retained after the variable selection procedure (see materials and methods) and  
9 therefore included in the path analysis were shown with underlines.

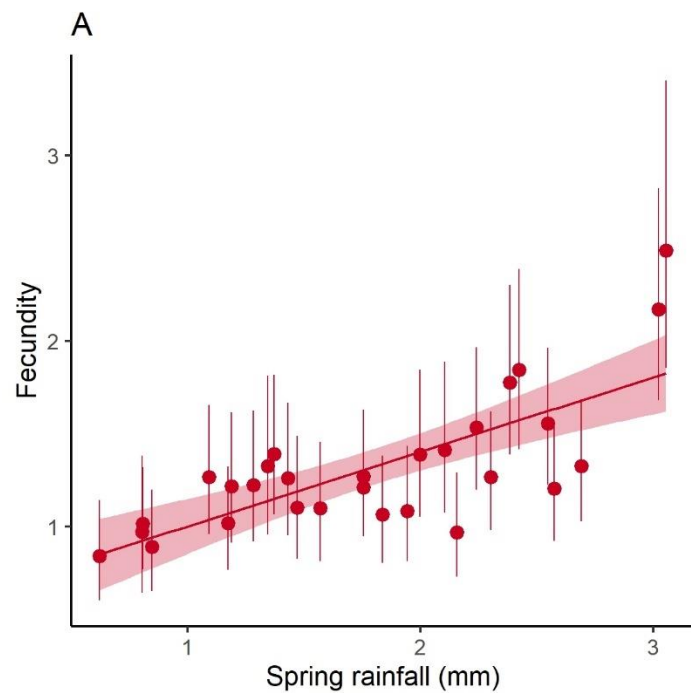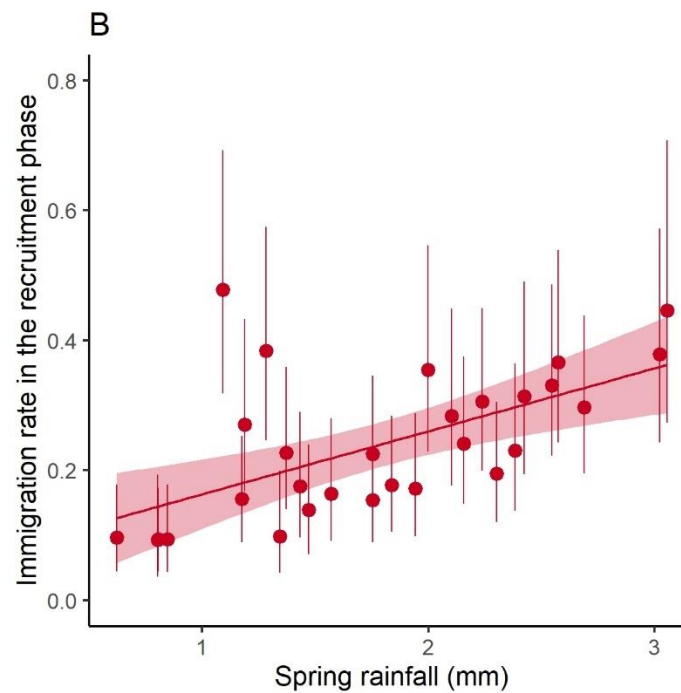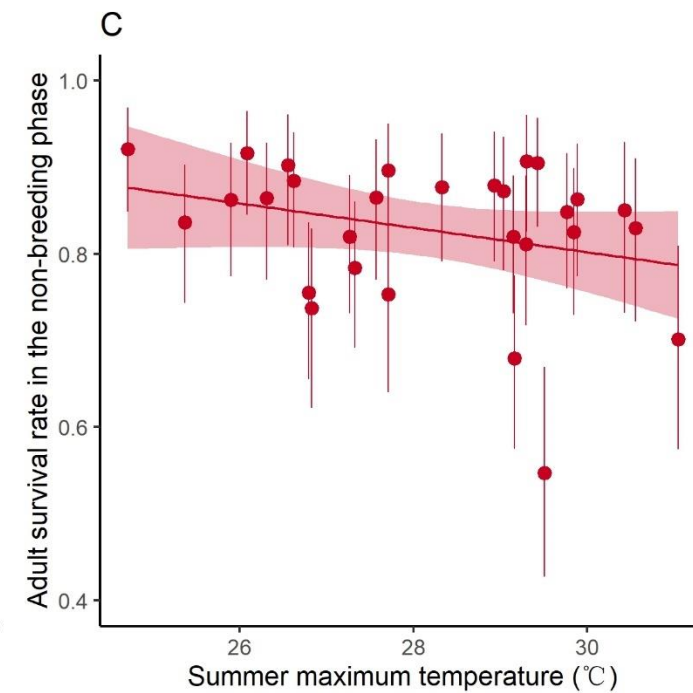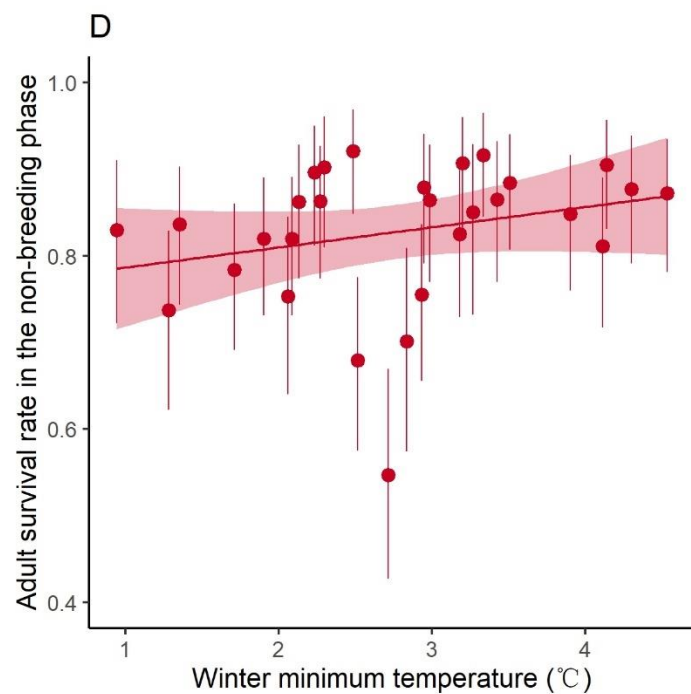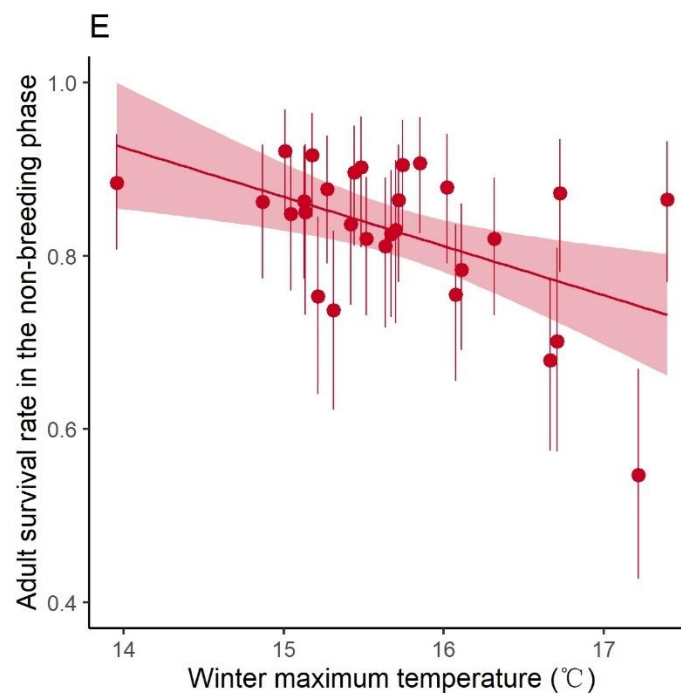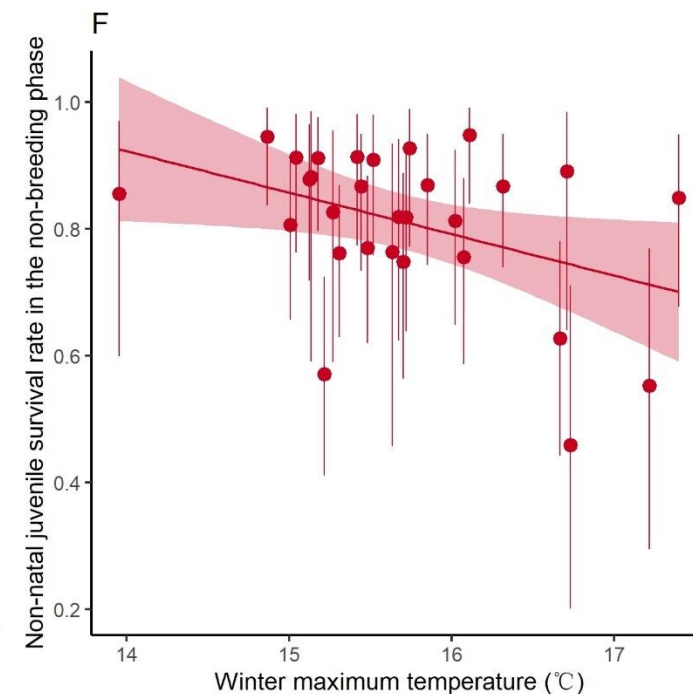

10 **Extended Data Fig. 2 | The significant effects of climate variables on vital rates in *female* superb fairy-wrens.** The lines are simple linear  
11 regressions through the 29 data points (mean $\pm$ 95% credible intervals; dots and error bars), and the shaded areas represent 95% confidence intervals  
12 of the lines.

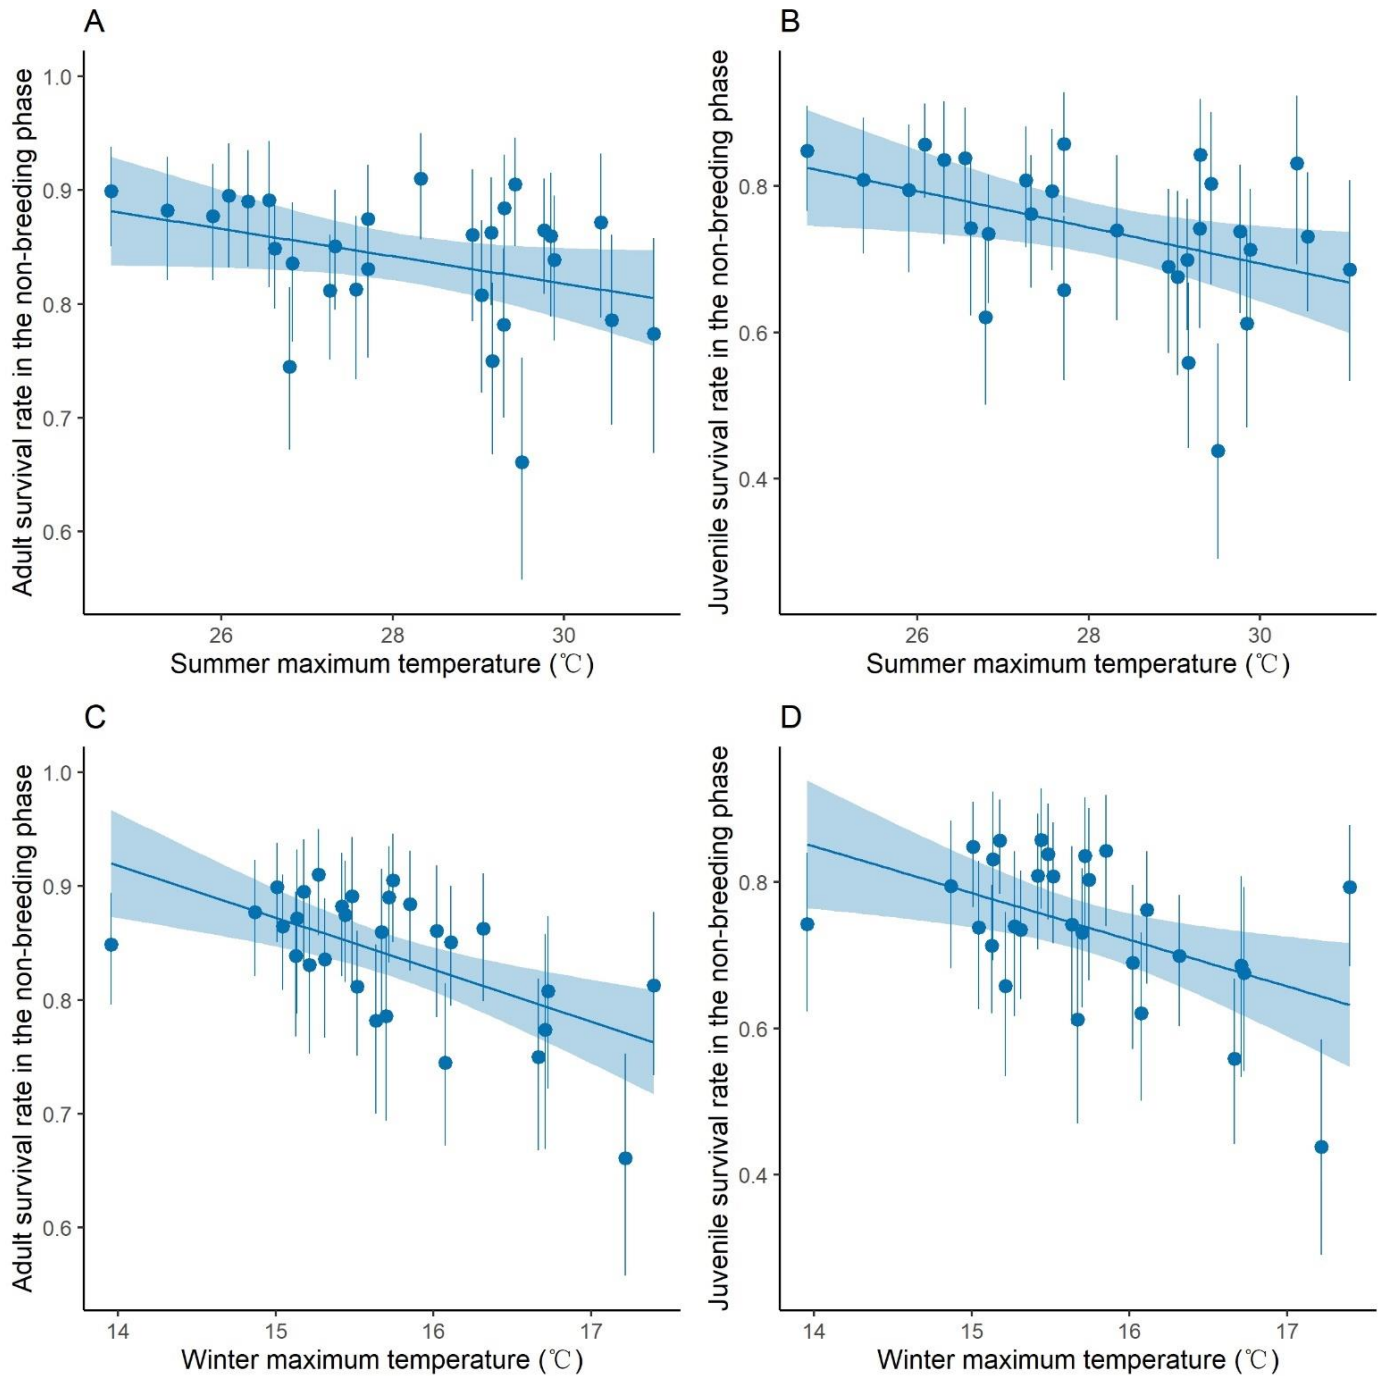

13 **Extended Data Fig. 3 | The significant effects of climate variables on vital rates in *male***  
 14 **superb fairy-wrens.** The lines are simple linear regressions through the 29 data points  
 15 (mean $\pm$ 95% credible intervals; dots and error bars), and the shaded areas represent 95%  
 16 confidence intervals of the lines.

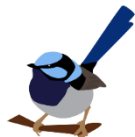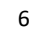

**Extended Data Fig. 4 | The path analyses of the effects of climate/density variables on population growth rate via vital rates of female (A) and male (B) superb fairy-wrens.** The path coefficients for the strength of association between the climate/density variables and the vital rates are estimates from Gaussian linear models (the female:  $N=7$  models; the male:  $N=4$  models). Negative associations are in red and positive are in black. Significant associations (where the 95% credible interval does not overlap with zero) are given in bold. By contrast, the path coefficients between vital rates and population growth rates are calculated directly (see materials and methods).  $r^2$  values (within boxes) refer to the proportions of the variance of each vital rate explained by the relevant climate/density variables in the Gaussian linear model. The magnitude of a particular demographic pathway is the product of the path coefficient from a given climate/density variable to a given vital rate and of the path coefficient from that vital rate to population growth rate (these are shown in Fig. 3 in the main text).



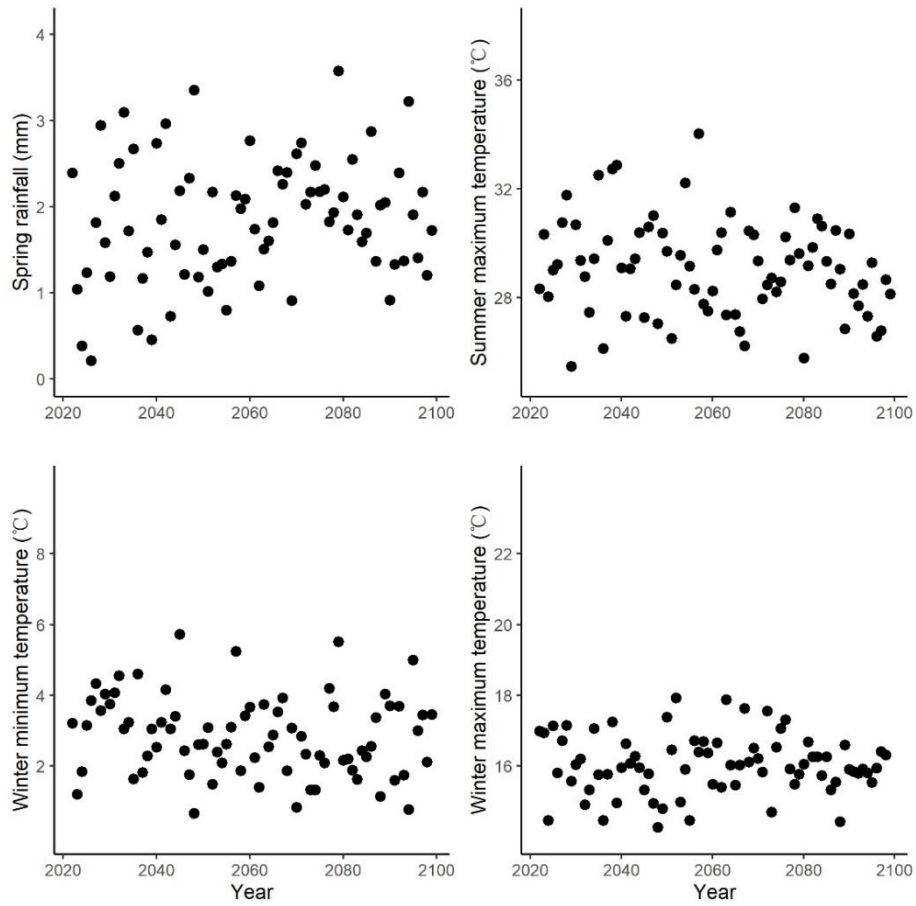

26 **Extended Data Fig. 5 | The changes of forecasted climate variables under the**  
 27 **scenario of no further emission-driven climate change.**

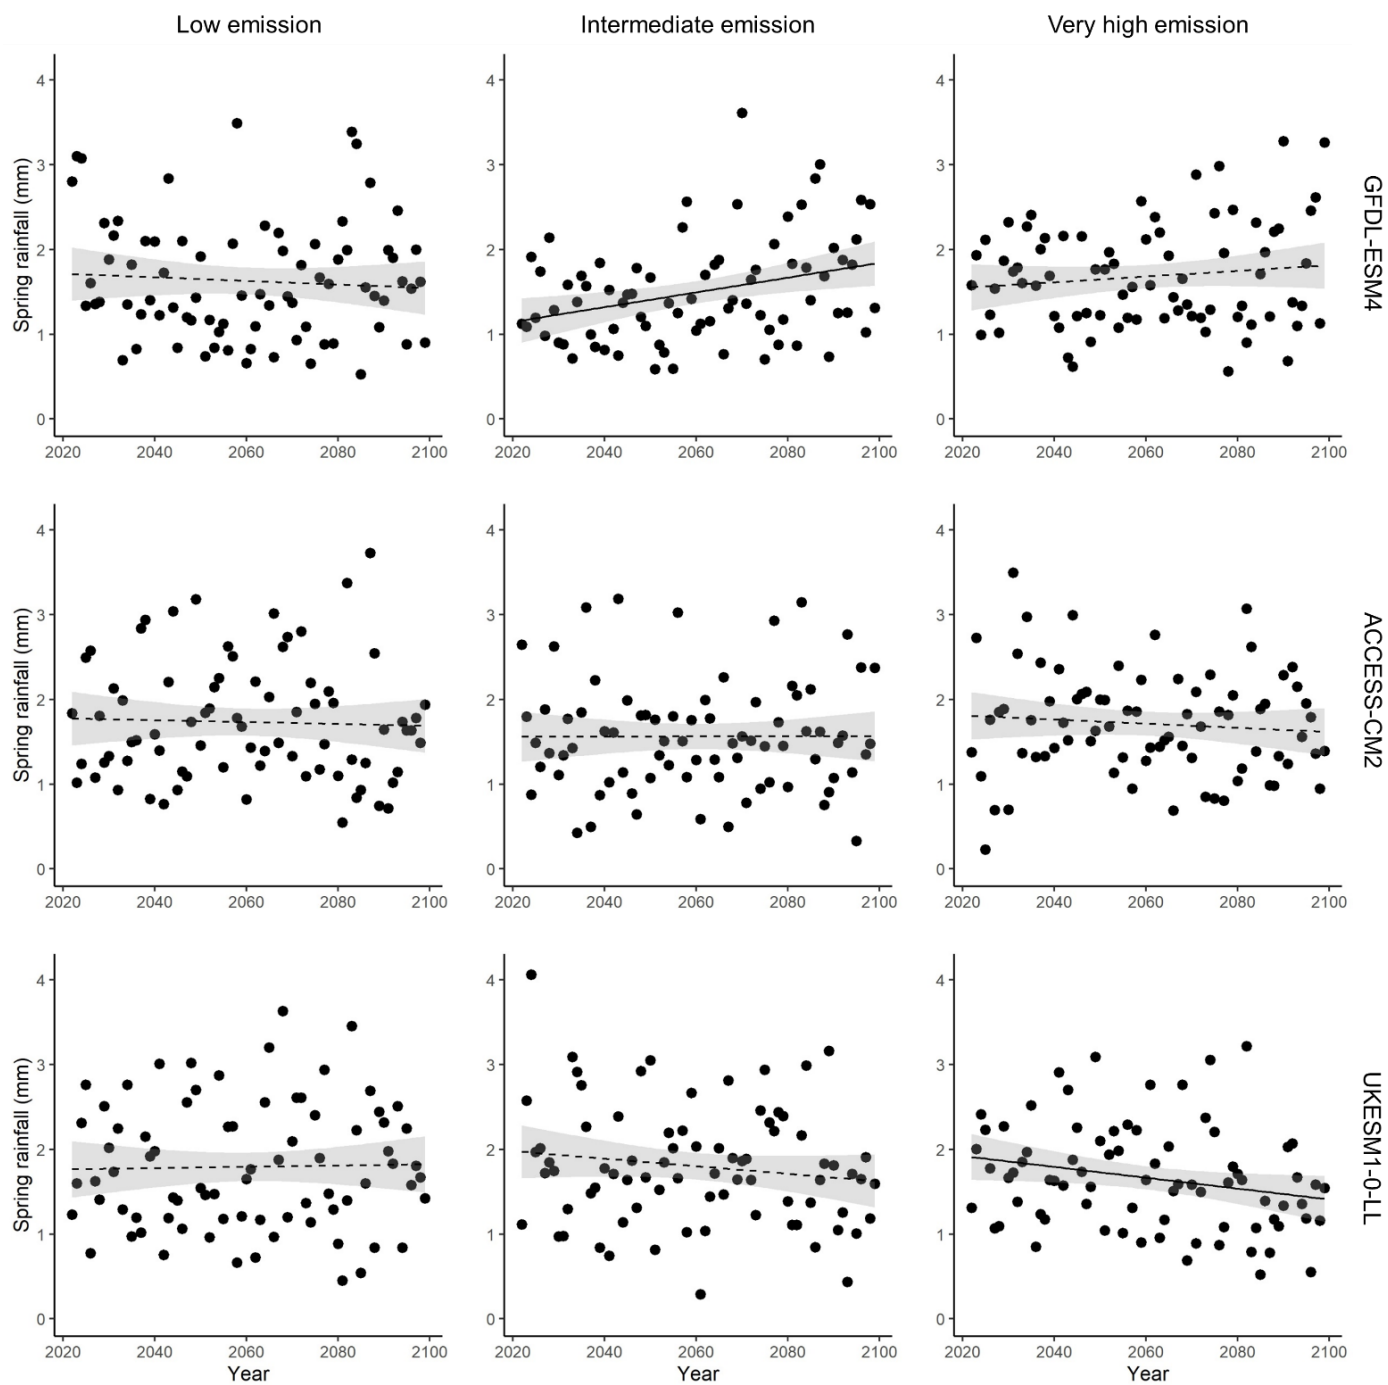

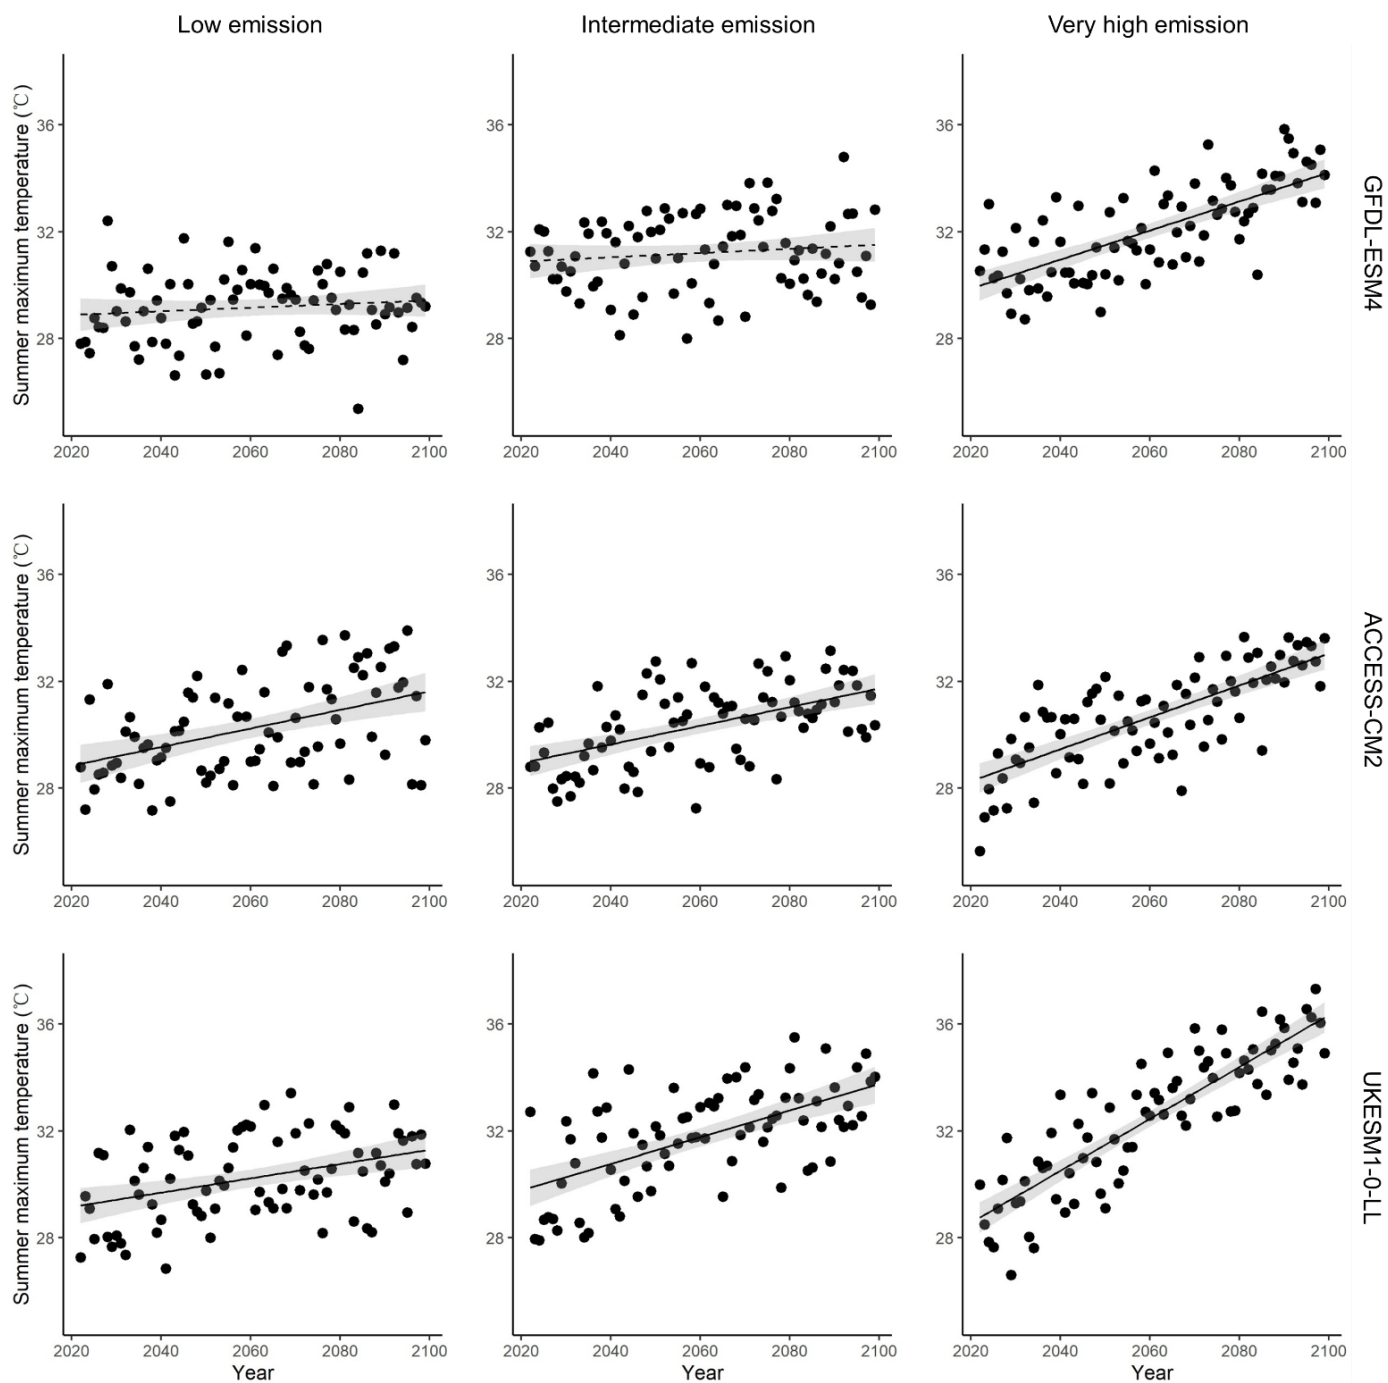

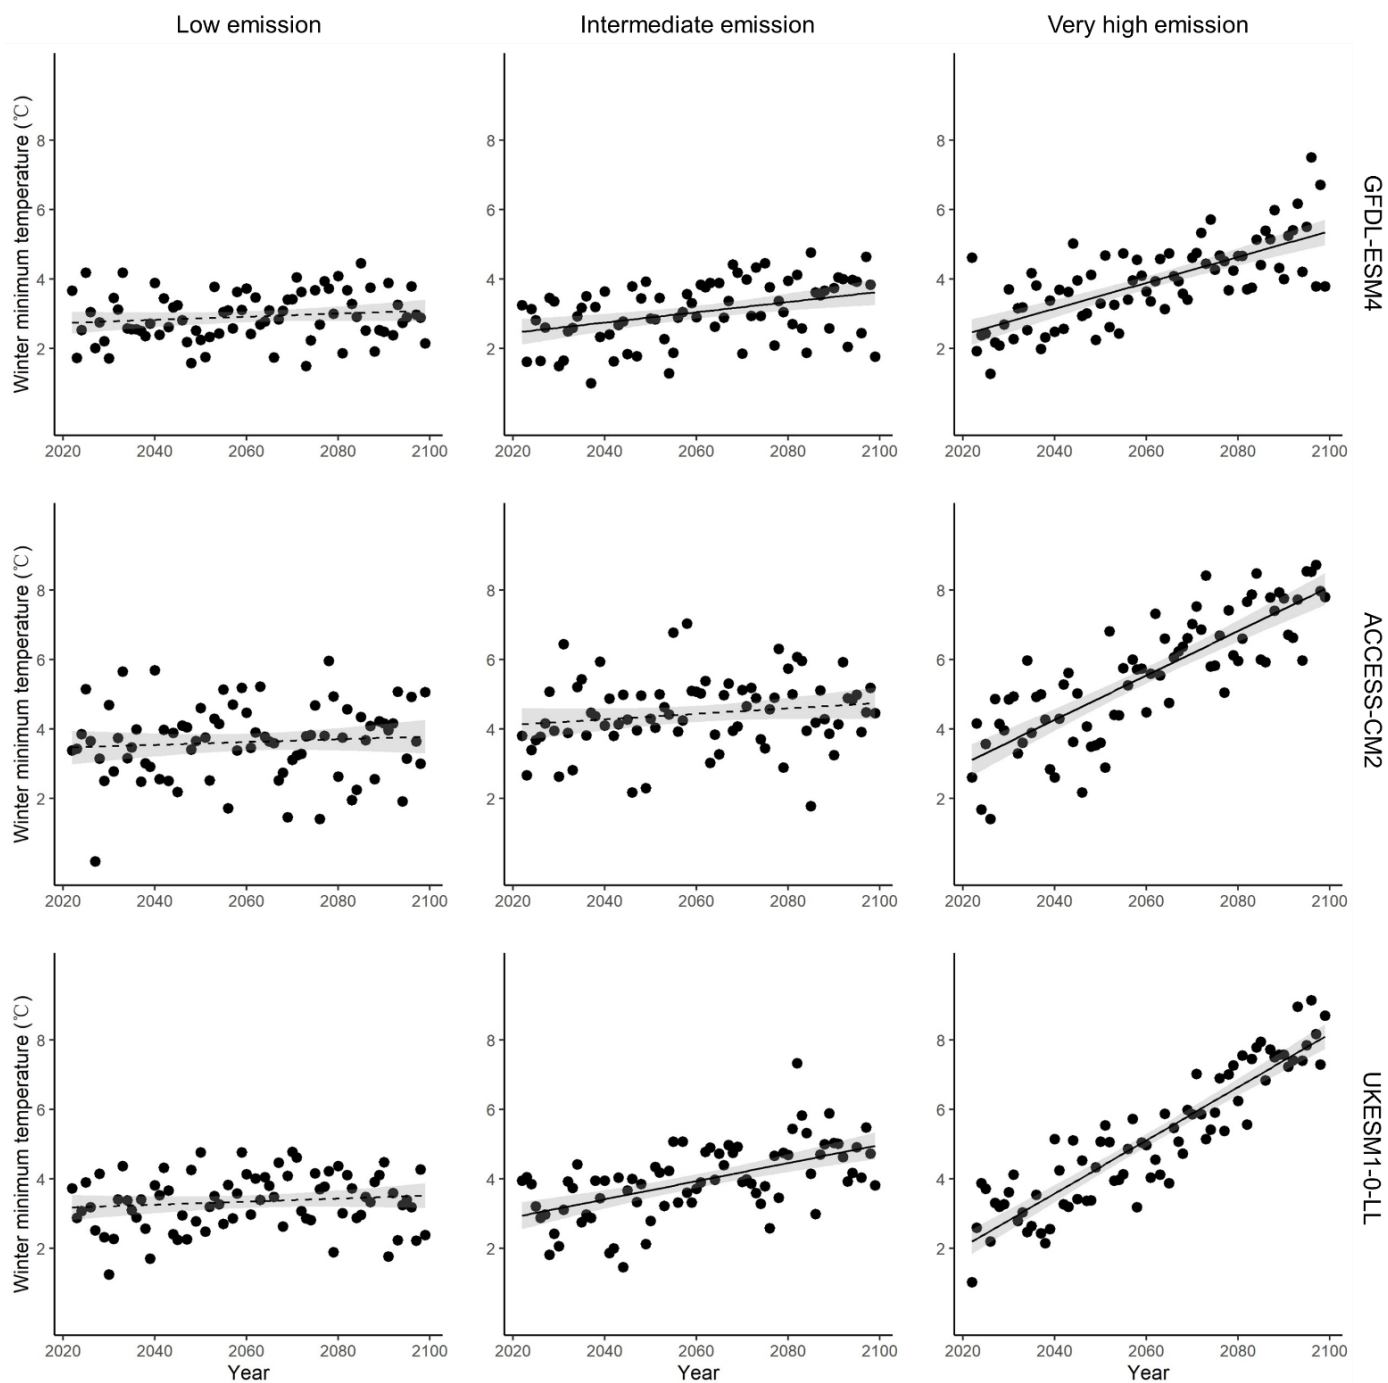

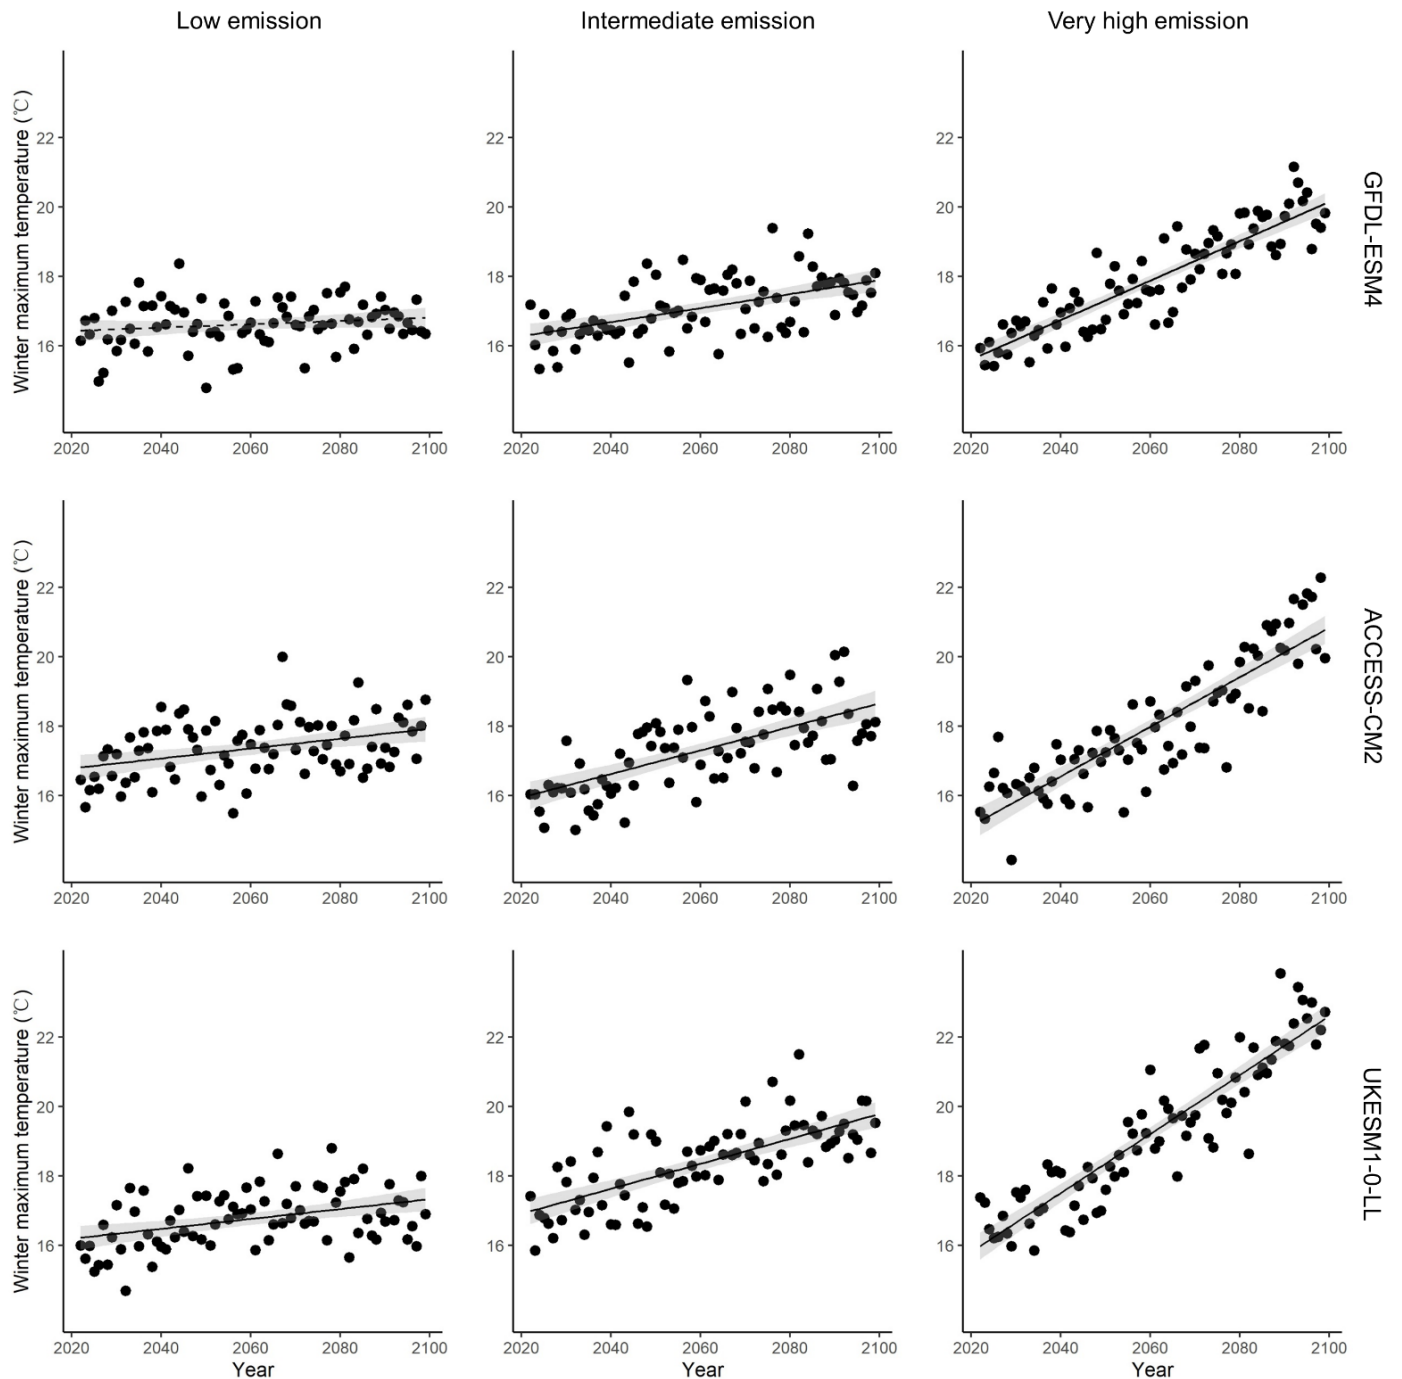

28 **Extended Data Fig. 6 | The changes of forecasted climate variables under three**  
 29 **climate change scenarios: low, intermediate and very high** greenhouse gas emission  
 30 scenarios. The forecasted climate data was obtained from three Coupled Model  
 31 Intercomparison Project Phase 6 (CMIP6) climate models: GFDL-ESM4, ACCESS-  
 32 CM2 and UKESM1-0-LL. The solid lines and dashed lines represent statistically  
 33 significant and non-significant relationships, respectively.

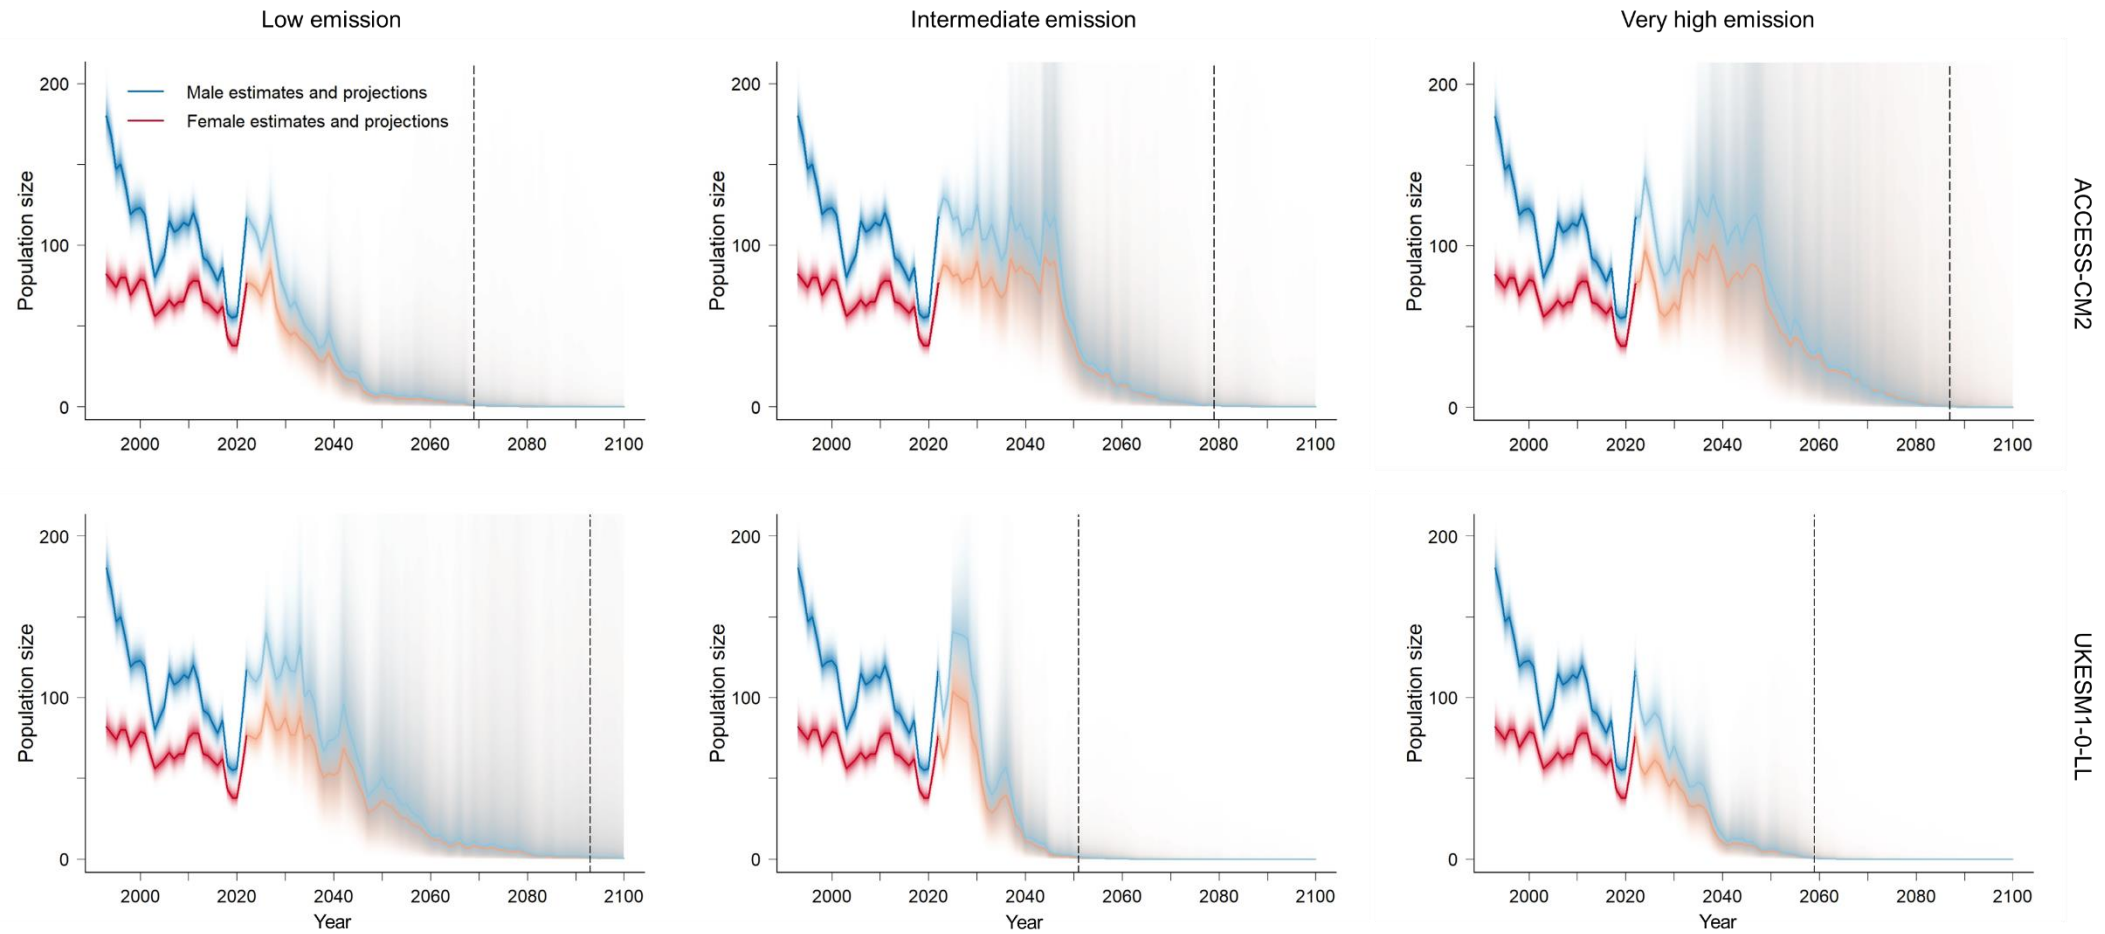

34 **Extended Data Fig. 7 | The estimated historical and projected population sizes of female and male superb fairy-wrens at the end of the**  
 35 **scramble phase (15 November) under three climate change scenarios: *low*, *intermediate* and *very high* greenhouse gas emission scenarios.**  
 36 Forecasted climate data were obtained from the Coupled Model Intercomparison Project Phase 6 (CMIP6) climate models ACCESS-CM2 and  
 37 UKESM1-0-LL. The bold colours represent estimated median number of individuals with corresponding uncertainty gradient (strip) by the

38 integrated population model (IPM) parameterised with the climate and demographic data from 1993 to 2022. The right two thick lines are the  
39 projected median population size from 2023 to 2100 with corresponding uncertainty gradient (strip), based on the IPM parameters from 1993 to  
40 2022. The thick dashed line in each panel is the year in which the probability of extinction is 50% (i.e. median population size of the female is less  
41 than 1).

42 **Table S1. The increases of temperatures (°C) from 2022 to 2100 in different climate**  
43 **change scenarios at both global scale and local (Canberra) scale.**

| Scale    | Climate model<br>or source | RCP | $\Delta$ annual mean<br>temp. | $\Delta$ annual<br>min. temp. | $\Delta$ annual<br>max.<br>temp. | $\Delta$ summer<br>max. temp. | $\Delta$ winter<br>min.<br>temp. | $\Delta$ winter<br>max.<br>temp. |
|----------|----------------------------|-----|-------------------------------|-------------------------------|----------------------------------|-------------------------------|----------------------------------|----------------------------------|
| Global   | IPCC                       | 2.6 | 0.44 (0.19, 0.87)             |                               |                                  |                               |                                  |                                  |
| Global   | IPCC                       | 4.5 | 1.47 (1.01, 2.12)             |                               |                                  |                               |                                  |                                  |
| Global   | IPCC                       | 8.5 | 3.42 (2.39, 4.72)             |                               |                                  |                               |                                  |                                  |
| Canberra | GFDL-ESM4                  | 2.6 |                               | 0.24                          | 0.47                             | 0.52                          | 0.35                             | 0.37                             |
| Canberra | GFDL-ESM4                  | 4.5 |                               | 1.16                          | 1.19                             | 0.61                          | 1.14                             | 1.55                             |
| Canberra | GFDL-ESM4                  | 8.5 |                               | 2.91                          | 4.03                             | 4.19                          | 2.87                             | 4.37                             |
| Canberra | ACCESS-CM2                 | 2.6 |                               | 0.57                          | 1.36                             | 2.68                          | 0.31                             | 1.10                             |
| Canberra | ACCESS-CM2                 | 4.5 |                               | 1.63                          | 2.71                             | 2.69                          | 0.61                             | 2.61                             |
| Canberra | ACCESS-CM2                 | 8.5 |                               | 5.28                          | 5.72                             | 4.60                          | 4.91                             | 5.50                             |
| Canberra | UKESM1-0-LL                | 2.6 |                               | 0.60                          | 1.27                             | 0.96                          | 0.34                             | 1.10                             |
| Canberra | UKESM1-0-LL                | 4.5 |                               | 2.38                          | 3.39                             | 3.01                          | 2.01                             | 2.77                             |
| Canberra | UKESM1-0-LL                | 8.5 |                               | 6.16                          | 7.09                             | 6.80                          | 5.90                             | 6.54                             |

44 Note: Global surface air temperature change are presented with the mean and 95% confidence intervals in  
45 parentheses.



46 **Table S2 | Vital rates and annual population growth rate of female or male superb fairy-**  
47 **wrens.** The median values with 95% credible intervals for each vital rate were estimated by  
48 the integrated population model.

|                                                            | Symbol                | Median | 95% credible interval |
|------------------------------------------------------------|-----------------------|--------|-----------------------|
| Female:                                                    |                       |        |                       |
| Fecundity                                                  | $\gamma_t$            | 1.247  | 0.770 - 2.464         |
| Offspring sex ratio                                        | $\tau_t$              | 0.386  | 0.330 - 0.444         |
| Natal philopatry rate                                      | $\pi_t$               | 0.889  | 0.797 - 0.951         |
| Adult survival rate in the recruitment phase               | $\varphi_{F, I, t}$   | 0.862  | 0.774 - 0.924         |
| Adult survival rate in the non-breeding phase              | $\varphi_{F, II, t}$  | 0.845  | 0.574 - 0.945         |
| Adult survival rate in the scramble phase                  | $\varphi_{F, III, t}$ | 0.811  | 0.757 - 0.859         |
| Natal juvenile survival rate in the non-breeding phase     | $\varphi_{L, II, t}$  | 0.805  | 0.535 - 0.952         |
| Natal juvenile survival rate in the scramble phase         | $\varphi_{L, III, t}$ | 0.311  | 0.204 - 0.443         |
| Non-natal juvenile survival rate in the non-breeding phase | $\varphi_{O, II, t}$  | 0.836  | 0.434 - 0.976         |
| Non-natal juvenile survival rate in the scramble phase     | $\varphi_{O, III, t}$ | 0.775  | 0.667 - 0.863         |
| Immigration rate in the recruitment phase                  | $\delta_{F, I, t}$    | 0.226  | 0.062 - 0.533         |
| Immigration rate in the scramble phase                     | $\delta_{F, III, t}$  | 0.158  | 0.097 - 0.244         |
| Male:                                                      |                       |        |                       |
| Probability of males being the dominant in their territory | $\psi_t$              | 0.635  | 0.475 - 0.758         |
| Adult survival rate in the recruitment phase               | $\varphi_{M, I, t}$   | 0.918  | 0.843 - 0.957         |
| Adult survival rate in the non-breeding phase              | $\varphi_{M, II, t}$  | 0.852  | 0.675 - 0.929         |
| Adult survival rate in the scramble phase                  | $\varphi_{M, III, t}$ | 0.848  | 0.762 - 0.915         |
| Juvenile survival rate in the non-breeding phase           | $\varphi_{J, II, t}$  | 0.752  | 0.465 - 0.897         |

|                                              |                     |       |               |
|----------------------------------------------|---------------------|-------|---------------|
| Juvenile survival rate in the scramble phase | $\varphi_{J,III,t}$ | 0.820 | 0.720 - 0.893 |
| Immigration rate in the scramble phase       | $\delta_{M,III,t}$  | 0.033 | 0.014 - 0.072 |

---

49

**Table S3 | Detection rates of adults and juveniles for female and male superb fairy-wrens conditioning on being alive.**

|                            | Recruitment phase    | Non-breeding phase   | Scramble phase       |
|----------------------------|----------------------|----------------------|----------------------|
| Female adults              | 0.938 (0.924, 0.950) | 0.996 (0.991, 0.999) | 0.990 (0.982, 0.995) |
| Female natal juveniles     |                      | 0.822(0.767, 0.869)  | 0.627 (0.556, 0.696) |
| Female non-natal juveniles |                      | 0.976 (0.957, 0.988) | 0.951 (0.922, 0.971) |
| Male adults                | 0.994 (0.990, 0.996) | 0.998 (0.995, 0.999) | 0.996 (0.993, 0.998) |
| Male juveniles             |                      | 0.996 (0.991, 0.999) | 0.991 (0.983, 0.996) |

Note: shown are median values with 95% credible intervals in patentheses. Detection rate of female natal juveniles was underestimated because emigration is not explicitly modelled in our capture mark recapture model, causing detection to be inflated by temporary emigration from the study area for the dispersing sex.

55 **Table S4 | Correlations among historical climate variables and the breeding vacancy**  
56 **availability index (N=29).**

|                                     | Spring<br>rainfall | Summer<br>max.<br>temp. | Winter<br>min.<br>temp. | Winter<br>max.<br>temp. | Breeding vacancy<br>availability<br>index |
|-------------------------------------|--------------------|-------------------------|-------------------------|-------------------------|-------------------------------------------|
| Spring rainfall                     | 1                  |                         |                         |                         |                                           |
| Summer max. temp.                   | -0.339             | 1                       |                         |                         |                                           |
| Winter min. temp.                   | <b>-0.565</b>      | 0.249                   | 1                       |                         |                                           |
| Winter max. temp.                   | 0.034              | 0.361                   | 0.066                   | 1                       |                                           |
| Breeding vacancy availability index | <b>-0.678</b>      | 0.288                   | 0.206                   | -0.010                  | 1                                         |

57 Note: significant Pearson correlations are shown in bold.
